# Supplementary material for: An ensemble model of QSAR tools for regulatory risk assessment
Source: PubMed Central journal article supplement (PMC5034616; doi:10.1186/s13321-016-0164-0), 2016-09-22
Supplement: 13321_2016_164_MOESM1_ESM.pdf [file 13321_2016_164_MOESM1_ESM.pdf]

## S1 Dataset 1: Air Toxins

Table S1: List of Chemicals for Dataset 1 (Air Toxins)

| No. | CASRN             | Chemical Name                                    |
|-----|-------------------|--------------------------------------------------|
| 1   | 2278-53-7         | [R-(E)]-5-isopropyl-8-methylnona-6,8,-dien-2-one |
| 2   | 7287-82-3         | 1-(2-methylphenyl)ethanol                        |
| 3   | 630-20-6          | 1,1,1,2-tetrachloroethane                        |
| 4   | 71-55-6           | 1,1,1-Trichloroethane                            |
| 5   | 79-00-5           | 1,1,2-trichloroethane                            |
| 6   | 75-34-3           | 1,1-dichloroethane                               |
| 7   | 75-35-4           | 1,1,-Dichloroethylene (1,1-DCE)                  |
| 8   | 156-59-2/156-60-5 | 1,2 (trans)-dichloroethylene                     |
| 9   | 87-61-6           | 1,2,3-trichlorobenzene                           |
| 10  | 96-18-4           | 1,2,3-Trichloropropane                           |
| 11  | 95-94-3           | 1,2,4,5-tetrachlorobenzene                       |
| 12  | 120-82-1          | 1,2,4-trichlorobenzene                           |
| 13  | 95-63-6           | 1,2,4-trimethylbenzene                           |
| 14  | 930-87-0          | 1,2,5-trimethylpyrrole                           |
| 15  | 84-78-6           | 1,2-benzenedicarboxylic acid, butyl octy         |
| 16  | 96-12-8           | 1,2-dibromo-3-chloropropane                      |
| 17  | 106-93-4          | 1,2-Dibromoethane                                |
| 18  | 95-50-1           | 1,2-dichlorobenzene                              |
| 19  | 107-06-2          | 1,2-dichloroethane                               |
| 20  | 78-87-5           | 1,2-Dichloropropane                              |
| 21  | 122-66-7          | 1,2-diphenylhydrazine                            |
| 22  | 106-88-7          | 1,2-Epoxybutane (EBU)                            |
| 23  | 2235-12-3         | 1,3,5 hexatriene                                 |
| 24  | 108-67-8          | 1,3,5-trimethylbenzene                           |
| 25  | 99-35-4           | 1,3,5-trinitrobenzene                            |
| 26  | 106-99-0          | 1,3-Butadiene                                    |
| 27  | 542-92-7          | 1,3-cyclopentadiene                              |
| 28  | 541-73-1          | 1,3-dichlorobenzene                              |
| 29  | 542-75-6          | 1,3-Dichloropropene                              |
| 30  | 99-65-0           | 1,3-dinitrobenzene                               |
| 31  | 646-06-0          | 1,3-dioxalane                                    |
| 32  | 106-46-7          | 1,4-Dichlorobenzene                              |
| 33  | 123-91-1          | 1,4-dioxane                                      |
| 34  | 575-43-9          | 1,6-dimethylnaphthalene                          |
| 35  | 822-06-0          | 1,6-Hexamethylene disocyanate                    |
| 36  | 75-68-3           | 1-Chloro-1,1-difluoroethane                      |
| 37  | 622-96-8          | 1-ethenyl-4-methyl-benzene                       |
| 38  | 621-32-9          | 1-ethoxy-3-methyl-benzene                        |

| No. | CASRN      | Chemical Name                                     |
|-----|------------|---------------------------------------------------|
| 39  | 874-41-9   | 1-ethyl-2,4-dimethyl-benzene                      |
| 40  | 620-14-4   | 1-ethyl-3-methyl-benzene                          |
| 41  | 622-96-8   | 1-ethyl-4-methylbenzene                           |
| 42  | 592-41-6   | 1-hexene                                          |
| 43  | 3034-50-2  | 1H-imidazole-4-carbaldehyde                       |
| 44  | 99-87-6    | 1-isopropyl-4-methylbenzene                       |
| 45  | 2886-59-1  | 1-methoxy-1,4-cyclohexadiene                      |
| 46  | 767-59-9   | 1-methyl-1H-indene                                |
| 47  | 99-85-4    | 1-methyl-4-(1-methylethyl)1,4-cyclohexadiene      |
| 48  | 3333-13-9  | 1-methyl-4-(2-propenyl)-benzene                   |
| 49  | 90-12-0    | 1-methylnaphthalene                               |
| 50  | 110-66-7   | 1-pentanethiol                                    |
| 51  | 103-65-1   | 1-propylbenzene                                   |
| 52  | 2409-55-4  | 2-(1,1-dimethylethyl)-4-methyl-phenol             |
| 53  | 2219-82-1  | 2-(1,1-dimethylethyl)-6-methyl-phenol             |
| 54  | 4901-51-3  | 2,3,4,5-tetrachlorophenol                         |
| 55  | 58-90-2    | 2,3,4,6-tetrachlorophenol                         |
| 56  | 28790-86-5 | 2,3,4-trimethyl-2-cyclopenten-1-one               |
| 57  | 431-03-8   | 2,3-butanedione                                   |
| 58  | 83-33-0    | 2,3-dihydro-1H-inden-1-one                        |
| 59  | 526-75-0   | 2,3-dimethyl-phenol                               |
| 60  | 118-96-7   | 2,4,6-trinitrotoluene                             |
| 61  | 96-76-4    | 2,4-bis(1,1-dimethylethyl)-phenol                 |
| 62  | 120-83-2   | 2,4-dichlorophenol                                |
| 63  | 13494-06-9 | 2,4-dimethyl-1,3-cyclopentanedione                |
| 64  | 565-80-0   | 2,4-dimethyl-3-pentanone                          |
| 65  | 105-67-9   | 2,4-dimethylphenol                                |
| 66  | 51-28-5    | 2,4-dinitrophenol                                 |
| 67  | 26471-62-5 | 2,4/2,6-Toluene diisocyanate mixture (TDI)        |
| 68  | 5875-45-6  | 2,5-bis(1,1-dimethylethyl)-phenol                 |
| 69  | 120-52-5   | 2,5-cyclohexadiene-1,4-dione, bis(O-benzoyloxime) |
| 70  | 3891-98-3  | 2,6,10-trimethyldodecane                          |
| 71  | 112-35-6   | 2-[2-(2-methoxyethoxy)ethoxy]-ethanol             |
| 72  | 78-92-2    | 2-butanol                                         |
| 73  | 78-93-3    | 2-butanone                                        |
| 74  | 532-27-4   | 2-Chloroacetophenone                              |
| 75  | 91-58-7    | 2-chloronaphthalene                               |
| 76  | 95-57-8    | 2-chlorophenol                                    |
| 77  | 693-54-9   | 2-decanone                                        |
| 78  | 769-25-5   | 2-ethenyl-1,3,5-trimethyl-benzene                 |
| 79  | 110-80-5   | 2-Ethoxyethanol                                   |

| No. | CASRN      | Chemical Name                                      |
|-----|------------|----------------------------------------------------|
| 80  | 1758-88-9  | 2-ethyl-1,4-dimethylbenzene                        |
| 81  | 104-76-7   | 2-ethyl-1-hexanol                                  |
| 82  | 1551-06-0  | 2-ethyl-1H-pyrrole                                 |
| 83  | 123-05-7   | 2-ethylhexanal                                     |
| 84  | 591-78-6   | 2-Hexanone                                         |
| 85  | 90-02-8    | 2-hydroxybenzaldehyde                              |
| 86  | 1195-09-1  | 2-methoxy-5-methylphenol                           |
| 87  | 109-86-4   | 2-Methoxyethanol                                   |
| 88  | 636-41-9   | 2-methyl-1H-pyrrole                                |
| 89  | 75-66-1    | 2-methyl-2-propanethiol                            |
| 90  | 565-69-5   | 2-methyl-3-pentanone                               |
| 91  | 78-78-4    | 2-methylbutane                                     |
| 92  | 91-57-6    | 2-methylnaphthalene                                |
| 93  | 95-48-7    | 2-methylphenol                                     |
| 94  | 75-66-1    | 2-methyl-propane-2-thiol                           |
| 95  | 78-84-2    | 2-methylpropanal                                   |
| 96  | 554-14-3   | 2-methylthiophene                                  |
| 97  | 7045-71-8  | 2-methylundecane                                   |
| 98  | 88-74-4    | 2-nitroaniline                                     |
| 99  | 79-46-9    | 2-Nitropropane                                     |
| 100 | 821-55-6   | 2-nonanone                                         |
| 101 | 111-13-7   | 2-octanone                                         |
| 102 | 2809-67-8  | 2-octyne                                           |
| 103 | 107-87-9   | 2-pentanone                                        |
| 104 | 21915-53-7 | 2-phenyl-oxiranemethanol                           |
| 105 | 75-33-2    | 2-propanethiol                                     |
| 106 | 873-94-9   | 3,3,5-trimethylcyclohexanone                       |
| 107 | 119-90-4   | 3,3-dimethoxybenzidine                             |
| 108 | 27129-87-9 | 3,5-dimethyl-benzenemethanol                       |
| 109 | 108-68-9   | 3,5-dimethyl-phenol                                |
| 110 | 26472-00-4 | "3a,4,7,7a-tetrahydrodimethyl-4,7-methano-1H-inde" |
| 111 | 21835-01-8 | 3-ethyl-2-hydroxy-2-cyclopenten-1-one              |
| 112 | 767-60-2   | 3-methyl-1H-indene                                 |
| 113 | 563-80-4   | 3-methyl-2-butanone                                |
| 114 | 590-86-3   | 3-methylbutanal                                    |
| 115 | 96-14-0    | 3-methylpentane                                    |
| 116 | 108-39-4   | 3-methylphenol                                     |
| 117 | 99-09-2    | 3-nitroaniline                                     |
| 118 | 24851-98-7 | 3-oxo-2-pentyl-cyclopentaneacetic acid             |
| 119 | 96-22-0    | 3-pentanone                                        |
| 120 | 101-55-3   | 4-bromophenyl-phenylether                          |

| No. | CASRN      | Chemical Name                           |
|-----|------------|-----------------------------------------|
| 121 | 59-50-7    | 4-chloro-3-methylphenol                 |
| 122 | 7005-72-3  | 4-chlorophenyl-phenylether              |
| 123 | 2896-60-8  | 4-ethyl-1,3-benzenediol                 |
| 124 | 4748-78-1  | 4-ethylbenzaldehyde                     |
| 125 | 121-33-5   | 4-hydroxy-3-methoxybenzaldehyde         |
| 126 | 150-76-5   | 4-methoxyphenol                         |
| 127 | 108-10-1   | 4-methyl-2-pentanone                    |
| 128 | 141-79-7   | 4-methyl-3-penten-2-one                 |
| 129 | 104-87-0   | 4-methylbenzaldehyde                    |
| 130 | 589-18-4   | 4-methyl-benzenemethanol                |
| 131 | 106-44-5   | 4-methylphenol(p-cresol)                |
| 132 | 100-01-6   | 4-nitroaniline                          |
| 133 | 3775-01-7  | 5-benzylidenehydantoin                  |
| 134 | 15356-70-4 | 5-methyl-2-(1-methylethyl)-cyclohexanol |
| 135 | 17312-76-4 | 6,6-dimethylundecane                    |
| 136 | 514-10-3   | abietic acid                            |
| 137 | 75-07-0    | Acetaldehyde                            |
| 138 | 75-05-8    | Acetonitrile                            |
| 139 | 98-86-2    | acetophenone                            |
| 140 | 107-02-8   | Acrolein                                |
| 141 | 79-06-1    | Acrylamide                              |
| 142 | 79-10-7    | Acrylic acid                            |
| 143 | 107-13-1   | Acrylonitrile                           |
| 144 | 107-05-1   | Allyl chloride                          |
| 145 | 319-84-6   | alpha-hexachlorocyclohexane             |
| 146 | 62-53-3    | Aniline                                 |
| 147 | 120-12-7   | anthracenea                             |
| 148 | 12674-11-2 | aroclor 1016                            |
| 149 | 100-52-7   | benzaldehyde                            |
| 150 | 71-43-2    | Benzene                                 |
| 151 | 60-12-8    | benzeneethanol                          |
| 152 | 56-55-3    | benzo(a)anthracenea                     |
| 153 | 50-32-8    | benzo(a)pyrene                          |
| 154 | 191-24-2   | benzo(ghi)perylenea                     |
| 155 | 65-85-0    | benzoic acid                            |
| 156 | 100-47-0   | benzonitrile                            |
| 157 | 100-51-6   | benzyl alcohol                          |
| 158 | 100-44-7   | benzyl chloride                         |
| 159 | 319-85-7   | beta-hexachlorocyclohexane              |
| 160 | 92-52-4    | biphenyl                                |
| 161 | 111-44-4   | bis(2-chlorethyl)ether                  |

| No. | CASRN               | Chemical Name                 |
|-----|---------------------|-------------------------------|
| 162 | 108-60-1            | bis-1,2-chloroisopropyl ether |
| 163 | 464-41-5            | bornyl chloride               |
| 164 | 108-86-1            | Bromobenzene                  |
| 165 | 75-27-4             | bromodichloromethane          |
| 166 | 75-25-2             | bromoform                     |
| 167 | 74-83-9             | Bromomethane                  |
| 168 | 123-72-8            | butanal                       |
| 169 | 106-97-8            | butane                        |
| 170 | 107-92-6            | butanoic acid                 |
| 171 | 128-37-0            | butylated hydroxytoluene      |
| 172 | 123-72-8            | butyraldehyde                 |
| 173 | 56-23-5             | Carbon tetrachloride          |
| 174 | 108-90-7            | chlorobenzene                 |
| 175 | 75-45-6             | Chlorodifluoromethane         |
| 176 | 75-00-3             | chloroethane                  |
| 177 | 218-01-9            | chrysene a                    |
| 178 | 156-59-2            | cis-1,2-dichloroethylene      |
| 179 | 123-73-9/15798-64-8 | crotonaldehyde                |
| 180 | 98-82-8             | Cumene                        |
| 181 | 592-57-4            | cyclohexa-1,3-diene           |
| 182 | 110-82-7            | Cyclohexane                   |
| 183 | 108-94-1            | cyclohexanone                 |
| 184 | 108-91-8            | cyclohexylamine               |
| 185 | 542-92-7            | cyclopentadiene               |
| 186 | 124-18-5            | decane                        |
| 187 | 53-70-3             | dibenzo(ah)anthracene a       |
| 188 | 124-48-1            | dibromochloromethane          |
| 189 | 75-09-2             | Dichloromethane               |
| 190 | 75-71-8             | dichlorodifluoromethane       |
| 191 | 62-73-7             | Dichlorvos                    |
| 192 | 110-81-6            | diethyl disulfide             |
| 193 | 84-66-2             | diethyl phthalate             |
| 194 | 352-93-2            | diethyl sulfide               |
| 195 | 108-83-8            | diisobutylketone              |
| 196 | 624-92-0            | dimethyl disulfide            |
| 197 | 131-11-3            | dimethyl phthalate            |
| 198 | 75-18-3             | dimethyl sulfide              |
| 199 | 3658-80-8           | dimethyl trisulfide           |
| 200 | 127-19-5            | dimethylacetamide             |
| 201 | 2432-89-5           | di-n-decyl sebacate           |
| 202 | 117-84-0            | di-n-octylphthalate           |

| No. | CASRN    | Chemical Name                                            |
|-----|----------|----------------------------------------------------------|
| 203 | 112-40-3 | dodecane                                                 |
| 204 | 112-95-8 | eicosane                                                 |
| 205 | 506-30-9 | eicosanoic acid                                          |
| 206 | 106-89-8 | Epichlorohydrin                                          |
| 207 | 75-08-1  | ethanethiol                                              |
| 208 | 64-17-5  | ethanol                                                  |
| 209 | 75-00-3  | Ethyl Chloride                                           |
| 210 | 111-76-2 | Ethylene glycol monobutyl ether (EGBE) (2-Butoxyethanol) |
| 211 | 97-63-2  | ethyl methacrylate                                       |
| 212 | 62-50-0  | ethyl methanesulfonate                                   |
| 213 | 624-89-5 | ethyl methyl sulfide                                     |
| 214 | 100-41-4 | Ethylbenzene                                             |
| 215 | 106-93-4 | ethylene dibromide                                       |
| 216 | 75-21-8  | ethylene oxide                                           |
| 217 | 64-18-6  | formic acid                                              |
| 218 | 629-78-7 | heptadecane                                              |
| 219 | 142-82-5 | heptane                                                  |
| 220 | 111-14-8 | heptanoic acid                                           |
| 221 | 87-68-3  | hexachloro-1,3-butadiene                                 |
| 222 | 118-74-1 | hexachlorobenzene                                        |
| 223 | 77-47-4  | Hexachlorocyclopentadiene (HCCPD)                        |
| 224 | 67-72-1  | Hexachloroethane                                         |
| 225 | 70-30-4  | hexachlorophene                                          |
| 226 | 544-76-3 | hexadecane                                               |
| 227 | 66-25-1  | hexaldehyde                                              |
| 228 | 110-54-3 | n-Hexane                                                 |
| 229 | 95-13-6  | indene                                                   |
| 230 | 79-77-6  | ionone                                                   |
| 231 | 75-28-5  | iso-butane                                               |
| 232 | 78-59-1  | isophorone                                               |
| 233 | 67-63-0  | iso-propanol                                             |
| 234 | 98-82-8  | isopropylbenzene                                         |
| 235 | 50-21-5  | lactic acid                                              |
| 236 | 97-67-6  | malic acid                                               |
| 237 | 78-85-3  | methacrolein                                             |
| 238 | 126-98-7 | methacrylonitrile                                        |
| 239 | 74-93-1  | methanethiol                                             |
| 240 | 79-20-9  | methyl acetate                                           |
| 241 | 74-83-9  | methyl bromide                                           |
| 242 | 74-87-3  | Methyl chloride                                          |
| 243 | 78-93-3  | Methyl ethyl ketone (MEK)                                |

| No. | CASRN               | Chemical Name                                     |
|-----|---------------------|---------------------------------------------------|
| 244 | 108-10-1            | Methyl isobutyl ketone (MIBK)                     |
| 245 | 80-62-6             | Methyl methacrylate                               |
| 246 | 298-00-0            | methyl parathion                                  |
| 247 | 1634-04-4           | Methyl tert-butyl ether (MTBE)                    |
| 248 | 108-87-2            | methylcyclohexane                                 |
| 249 | 96-37-7             | methylcyclopentane                                |
| 250 | 74-95-3             | methylene bromide                                 |
| 251 | 75-09-2             | methylene chloride                                |
| 252 | 101-68-8, 9016-87-9 | Methylene Diphenyl Diisocyanate and polymeric MDI |
| 253 | 78-98-8             | methylglyoxal                                     |
| 254 | 91-20-3             | Napthalene                                        |
| 255 | 68-12-2             | N,N-Dimethylformamide                             |
| 256 | 629-97-0            | n-docosane                                        |
| 257 | 463-82-1            | neo-pentane                                       |
| 258 | 629-94-7            | n-heneicosane                                     |
| 259 | 57-10-3             | n-hexadecanoic acid                               |
| 260 | 98-95-3             | Nitrobenzene                                      |
| 261 | 924-16-3            | n-nitroso-di-n-butylamine                         |
| 262 | 86-30-6             | n-nitrosodiphenylamine                            |
| 263 | 621-64-7            | n-nitrosodipropylamine                            |
| 264 | 111-84-2            | nonane                                            |
| 265 | 103-65-1            | n-propylbenzene                                   |
| 266 | 14167-59-0          | n-tetratriacontane                                |
| 267 | 638-68-6            | n-triacontane                                     |
| 268 | 57-11-4             | octadecanoic acid                                 |
| 269 | 111-65-9            | octane                                            |
| 270 | 95-53-4             | o-toluidine                                       |
| 271 | 144-62-7            | oxalic acid                                       |
| 272 | 106-47-8            | p-chloroaniline                                   |
| 273 | 608-93-5            | pentachlorobenzene                                |
| 274 | 82-68-8             | pentachloronitrobenzene                           |
| 275 | 87-86-5             | pentachlorophenol                                 |
| 276 | 109-66-0            | pentane                                           |
| 277 | 4292-92-6           | pentylcyclohexane                                 |
| 278 | 85-01-8             | phenanthrene                                      |
| 279 | 108-95-2            | phenol                                            |
| 280 | 60-12-8             | phenylethanol                                     |
| 281 | 75-44-5             | Phosgene                                          |
| 282 | 85-44-9             | phthalic anhydride                                |
| 283 | 123-38-6            | propanal                                          |
| 284 | 74-98-6             | propane                                           |

| No. | CASRN     | Chemical Name                            |
|-----|-----------|------------------------------------------|
| 285 | 75-33-2   | propane-2-thiol                          |
| 286 | 115-07-1  | propene                                  |
| 287 | 123-38-6  | Propionaldehyde                          |
| 288 | 107-98-2  | Propylene glycol monomethyl ether (PGME) |
| 289 | 75-56-9   | Propylene oxide                          |
| 290 | 129-00-0  | pyrenea                                  |
| 291 | 110-86-1  | pyridine                                 |
| 292 | 3232-37-9 | salicylidene benzhydrazide               |
| 293 | 100-42-5  | Styrene                                  |
| 294 | 127-18-4  | Tetrachloroethylene                      |
| 295 | 629-59-4  | tetradecane                              |
| 296 | 109-99-9  | Tetrahydrofuran                          |
| 297 | 7098-22-8 | tetratetracontane                        |
| 298 | 108-88-3  | Toluene                                  |
| 299 | 79-01-6   | Trichloroethylene                        |
| 300 | 75-69-4   | trichlorofluoromethane                   |
| 301 | 67-66-3   | trichloromethane                         |
| 302 | 629-50-5  | tridecane                                |
| 303 | 121-44-8  | Triethylamine                            |
| 304 | 75-50-3   | trimethylamine                           |
| 305 | 540-84-1  | 2,2,4-Trimethylpentane                   |
| 306 | 791-28-6  | triphenylphosphine oxide                 |
| 307 | 1120-21-4 | undecane                                 |
| 308 | 110-62-3  | valeraldehyde                            |
| 309 | 121-33-5  | vanillin                                 |
| 310 | 108-05-4  | Vinyl acetate                            |
| 311 | 593-60-2  | Vinyl bromide                            |
| 312 | 75-01-4   | Vinyl chloride                           |
| 313 | 95-47-6   | o-Xylene                                 |
| 314 | 106-42-3  | p-Xylene                                 |
| 315 | 544-25-2  | 1,3,5-cycloheptatriene                   |



## S2 Dataset 2: Subset of Carcinogenic Potency Database

Table S2: List of Chemicals for Dataset 2 (CPDB)

| No. | CASRN     | Chemical Name                                         |
|-----|-----------|-------------------------------------------------------|
| 1   | 62-73-7   | Dichlorvos                                            |
| 2   | 126-72-7  | Tris(2,3-dibromopropyl) phosphate                     |
| 3   | 597-25-1  | Dimethyl morpholinophosphoramidate                    |
| 4   | 52-68-6   | Trichlorfon                                           |
| 5   | 531-18-0  | Hexamethylmelamine                                    |
| 6   | 513-37-1  | Dimethylvinyl chloride (DMVC)                         |
| 7   | 593-60-2  | Vinyl bromide                                         |
| 8   | 75-02-5   | Ethene, fluoro-                                       |
| 9   | 75-01-4   | Ethene, chloro-                                       |
| 10  | 305-03-3  | Chlorambucil                                          |
| 11  | 50-18-0   | Cyclophosphamide                                      |
| 12  | 148-82-3  | Melphalan                                             |
| 13  | 3546-10-9 | Phenesterin                                           |
| 14  | 51-75-2   | Nitrogen mustard                                      |
| 15  | 3068-88-0 | beta-Butyrolactone                                    |
| 16  | 1955-45-9 | Pivalolactone                                         |
| 17  | 1120-71-4 | Propane sultone                                       |
| 18  | 57-57-8   | Propiolactone                                         |
| 19  | 106-92-3  | Allyl glycidyl ether                                  |
| 20  | 101-90-6  | Diglycidyl resorcinol ether, technical grade          |
| 21  | 77-83-8   | Ethyl-3-methyl-3-phenylglycidate                      |
| 22  | 75-21-8   | Ethylene oxide                                        |
| 23  | 106-87-6  | 4-Vinyl-1-cyclohexene diepoxide                       |
| 24  | 556-52-5  | Glycidol                                              |
| 25  | 57-39-6   | Metepa                                                |
| 26  | 122-60-1  | Phenyl glycidyl ether                                 |
| 27  | 75-56-9   | 1,2-Propylene oxide                                   |
| 28  | 96-09-3   | Styrene oxide                                         |
| 29  | 52-24-4   | Tris(aziridinyl)-phosphine sulfide (thio-tepa)        |
| 30  | 298-18-0  | 1,2,3,4-Diepoxbutane DL                               |
| 31  | 106-88-7  | 1,2-Epoxybutane                                       |
| 32  | 100-44-7  | Benzyl chloride                                       |
| 33  | 3296-90-0 | 2,2-Bis(bromomethyl)-1,3-propanediol, technical grade |
| 34  | 108-60-1  | Bis(2-chloro-1-methylethyl)ether, technical grade     |
| 35  | 75-27-4   | Bromodichloromethane                                  |
| 36  | 109-69-3  | n-Butyl chloride                                      |
| 37  | 75-88-7   | 2-Chloro-1,1,1-trifluoroethane                        |
| 38  | 532-27-4  | 2-Chloroacetophenone (CN)                             |

| No. | CASRN      | Chemical Name                              |
|-----|------------|--------------------------------------------|
| 39  | 124-48-1   | Chlorodibromomethane                       |
| 40  | 107-30-2   | Chloromethyl methyl ether                  |
| 41  | 96-12-8    | 1,2-Dibromo-3-chloropropane                |
| 42  | 106-93-4   | 1,2-Dibromoethane                          |
| 43  | 107-06-2   | 1,2-Dichloroethane                         |
| 44  | 78-87-5    | 1,2-Dichloropropane (propylene dichloride) |
| 45  | 72-56-0    | Di(p-ethylphenyl)dichloroethane            |
| 46  | 306-83-2   | Ethane, 2,2-dichloro-1,1,1-trifluoro-      |
| 47  | 144-48-9   | Iodoacetamide                              |
| 48  | 75-47-8    | Iodoform                                   |
| 49  | 3778-73-2  | Isophosphamide                             |
| 50  | 576-68-1   | Mannitol nitrogen mustard                  |
| 51  | 74-83-9    | Methyl bromide                             |
| 52  | 79-11-8    | Monochloroacetic acid                      |
| 53  | 79-34-5    | 1,1,2,2-Tetrachloroethane                  |
| 54  | 15318-45-3 | Thiamphenicol                              |
| 55  | 75-25-2    | Tribromomethane                            |
| 56  | 79-00-5    | 1,1,2-Trichloroethane                      |
| 57  | 96-18-4    | 1,2,3-Trichloropropane                     |
| 58  | 542-88-1   | Bis(chloromethyl) ether                    |
| 59  | 74-96-4    | Bromoethane (ethyl bromide)                |
| 60  | 75-45-6    | Methane, chlorodifluoro-                   |
| 61  | 75-00-3    | Chloroethane                               |
| 62  | 593-70-4   | Chlorofluoromethane                        |
| 63  | 75-34-3    | 1,1-Dichloroethane                         |
| 64  | 96-24-2    | 3-Chloro-1,2-propanediol                   |
| 65  | 75-09-2    | Methylene chloride                         |
| 66  | 10318-26-0 | Dibromodulcitol                            |
| 67  | 79-43-6    | Dichloroacetic acid                        |
| 68  | 542-56-3   | Isobutyl nitrite                           |
| 69  | 79-06-1    | Acrylamide                                 |
| 70  | 14484-47-0 | Deflazacort                                |
| 71  | 50-02-2    | Dexamethazone                              |
| 72  | 50-23-7    | Hydrocortisone                             |
| 73  | 78-59-1    | Isophorone                                 |
| 74  | 123-33-1   | Maleic hydrazide                           |
| 75  | 50-24-8    | Prednisolone                               |
| 76  | 37076-68-9 | Tegafur                                    |
| 77  | 76-25-5    | Triamcinolone acetonide                    |
| 78  | 66-22-8    | Uracil                                     |
| 79  | 34661-75-1 | Urapidil                                   |

| No. | CASRN      | Chemical Name                                    |
|-----|------------|--------------------------------------------------|
| 80  | 518-75-2   | Citrinin                                         |
| 81  | 51-21-8    | 5-Fluorouracil                                   |
| 82  | 75-07-0    | Acetaldehyde                                     |
| 83  | 100-52-7   | Benzaldehyde                                     |
| 84  | 98-01-1    | Furfural                                         |
| 85  | 129-43-1   | 1-Hydroxyanthraquinone                           |
| 86  | 129-15-7   | 2-Methyl-1-nitroanthraquinone                    |
| 87  | 117-10-2   | Danthron                                         |
| 88  | 81-54-9    | Purpurin                                         |
| 89  | 57-14-7    | Dimethyl hydrazine (DMH)                         |
| 90  | 34176-52-8 | 2-Hydrazino-4-phenylthiazole                     |
| 91  | 122-66-7   | Hydrazobenzene                                   |
| 92  | 54-85-3    | Isoniazid                                        |
| 93  | 6294-89-9  | Methyl carbazate                                 |
| 94  | 671-16-9   | Procarbazine                                     |
| 95  | 32852-21-4 | Formic acid 2-(4-methyl-2-thiazolyl)hydrazide    |
| 96  | 2411-74-7  | 2-Furaldehyde semicarbazone                      |
| 97  | 1156-19-0  | Tolazamide                                       |
| 98  | 25843-45-2 | Azoxymethane                                     |
| 99  | 622-78-6   | Benzyl isothiocyanate                            |
| 100 | 2257-09-2  | Phenethyl isothiocyanate                         |
| 101 | 10473-70-8 | 1-(4-Chlorophenyl)-1-phenyl-2-propynyl carbamate |
| 102 | 598-55-0   | Methyl carbamate                                 |
| 103 | 51-79-6    | Urethane                                         |
| 104 | 1212-29-9  | N,N'-Dicyclohexylthiourea                        |
| 105 | 96-45-7    | Ethylene thiourea (ETU)                          |
| 106 | 13752-51-7 | Morpholine, 4-[(4-morpholinylthio)thioxomethyl]- |
| 107 | 97-77-8    | Tetraethylthiuram disulfide                      |
| 108 | 137-26-8   | Tetramethylthiouram disulfide                    |
| 109 | 62-55-5    | Thioacetamide                                    |
| 110 | 62-56-6    | Thiourea                                         |
| 111 | 2489-77-2  | Trimethylthiourea                                |
| 112 | 105-55-5   | N,N'-Diethylthiourea                             |
| 113 | 50-32-8    | Benzo(a)pyrene                                   |
| 114 | 56-49-5    | 3-Methylcholanthrene                             |
| 115 | 128-66-5   | C.I Vat yellow 4                                 |
| 116 | 244-63-3   | Norharman                                        |
| 117 | 115-28-6   | Chlorendic acid                                  |
| 118 | 143-50-0   | Chlordecone (kepone)                             |
| 119 | 39801-14-4 | Mirex, photo-                                    |
| 120 | 2385-85-5  | Mirex                                            |

| No. | CASRN      | Chemical Name                                                         |
|-----|------------|-----------------------------------------------------------------------|
| 121 | 760-56-5   | 1-Allyl-1-nitrosoourea                                                |
| 122 | 10589-74-9 | 1-Amyl-1-nitrosoourea                                                 |
| 123 | 16338-97-9 | Diallylnitrosamine                                                    |
| 124 | 56654-52-5 | 1,3-Dibutyl-1-nitrosoourea                                            |
| 125 | 3276-41-3  | 3,6-Dihydro-2-nitroso-2H-1,2-oxazine                                  |
| 126 | 3851-16-9  | N,N'-Dimethyl-N,N'-dinitrosophthalamide                               |
| 127 | 55557-00-1 | Dinitrosohomopiperazine                                               |
| 128 | 38434-77-4 | Ethylnitrosocyanamide                                                 |
| 129 | 14026-03-0 | R(-)-2-Methyl-N-nitrosopiperidine (S(+)-2-Methyl-N-nitrosopiperidine) |
| 130 | 16813-36-8 | 1-Nitroso-5,6-dihydrouracil                                           |
| 131 | 55090-44-3 | N-Nitroso-N-methyl-N-dodecylamine                                     |
| 132 | 684-93-5   | N-Nitroso-N-methylurea                                                |
| 133 | 55556-92-8 | Nitroso-1,2,3,6-tetrahydropyridine                                    |
| 134 | 51542-33-7 | N-Nitrosobenzthiazuron                                                |
| 135 | 53609-64-6 | N-Nitrosobis(2-hydroxypropyl)amine                                    |
| 136 | 60599-38-4 | N-Nitrosobis(2-oxopropyl)amine                                        |
| 137 | 924-16-3   | Nitrosodibutylamine                                                   |
| 138 | 1116-54-7  | N-Nitrosodiethanolamine                                               |
| 139 | 55-18-5    | N-Nitrosodiethylamine                                                 |
| 140 | 62-75-9    | N-Nitrosodimethylamine                                                |
| 141 | 86-30-6    | N-Nitrosodiphenylamine                                                |
| 142 | 621-64-7   | N-Nitrosodipropylamine                                                |
| 143 | 17608-59-2 | N-Nitrosoephedrine                                                    |
| 144 | 10595-95-6 | Nitrosoethylmethylamine                                               |
| 145 | 614-95-9   | Nitrosoethylurethane                                                  |
| 146 | 30310-80-6 | Nitrosohydroxyproline                                                 |
| 147 | 26921-68-6 | N-Nitrosomethyl-(2-hydroxyethyl) amine                                |
| 148 | 614-00-6   | Nitrosomethylaniline                                                  |
| 149 | 59-89-2    | N-Nitrosomorpholine                                                   |
| 150 | 4515-18-8  | Nitrosopiperic acid                                                   |
| 151 | 930-55-2   | N-Nitrosopyrrolidine                                                  |
| 152 | 816-57-9   | N-Propyl-N-nitrosoourea                                               |
| 153 | 18883-66-4 | Streptozotocin                                                        |
| 154 | 40548-68-3 | Tetrahydro-2-nitroso-2H-1,2-oxazine                                   |
| 155 | 3817-11-6  | n-Butyl-N-(4-hydroxybutyl)nitrosamine                                 |
| 156 | 869-01-2   | N-n-Butyl-N-nitrosoourea                                              |
| 157 | 13256-06-9 | Dipentylnitrosamine                                                   |
| 158 | 13743-07-2 | 1-(2-Hydroxyethyl)-1-nitrosoourea                                     |
| 159 | 760-60-1   | N-Nitroso-N-isobutylurea                                              |
| 160 | 13256-11-6 | Nitroso-N-methyl-N-(2-phenyl)ethylamine                               |
| 161 | 1133-64-8  | Nitrosoanabasine                                                      |

| No. | CASRN      | Chemical Name                               |
|-----|------------|---------------------------------------------|
| 162 | 625-89-8   | N-Nitrosobis(2,2,2-trifluoroethyl) amine    |
| 163 | 42579-28-2 | 1-Nitrosohydantoin                          |
| 164 | 5632-47-3  | N-Nitrosopiperazine                         |
| 165 | 100-75-4   | N-Nitrosopiperidine                         |
| 166 | 7519-36-0  | Nitrosoproline                              |
| 167 | 26541-51-5 | N-Nitrosothiomorpholine                     |
| 168 | 7227-91-0  | 1-Phenyl-3,3-dimethyltriazene               |
| 169 | 4164-28-7  | Dimethylnitramine                           |
| 170 | 598-57-2   | Methylnitramine                             |
| 171 | 108-05-4   | Vinyl acetate                               |
| 172 | 611-23-4   | o-Nitrosotoluene                            |
| 173 | 3688-53-7  | AF-2                                        |
| 174 | 88-73-3    | 2-Chloronitrobenzene                        |
| 175 | 100-00-5   | 4-Chloronitrobenzene                        |
| 176 | 551-92-8   | 1,2-Dimethyl-5-nitroimidazole               |
| 177 | 606-20-2   | 2,6-Dinitrotoluene                          |
| 178 | 298-00-0   | Methyl parathion                            |
| 179 | 139-94-6   | Nithiazide                                  |
| 180 | 92-55-7    | 5-Nitro-2-furanmethanediol diacetate        |
| 181 | 91-23-6    | o-Nitroanisole                              |
| 182 | 98-95-3    | Nitrobenzene                                |
| 183 | 1836-75-5  | Nitrofen                                    |
| 184 | 86-57-7    | 1-Nitronaphthalene                          |
| 185 | 607-35-2   | 8-Nitroquinoline                            |
| 186 | 56-38-2    | Parathion                                   |
| 187 | 99-35-4    | 1,3,5-Trinitrobenzene                       |
| 188 | 97-00-7    | Dinitrochlorobenzene                        |
| 189 | 443-48-1   | Metronidazole                               |
| 190 | 62-23-7    | p-Nitrobenzoic acid                         |
| 191 | 613-50-3   | 6-Nitroquinoline                            |
| 192 | 91-76-9    | 1,3,5-Triazine-2,4-diamine, 6-phenyl-       |
| 193 | 108-78-1   | Melamine                                    |
| 194 | 396-01-0   | Triamterene                                 |
| 195 | 59-05-2    | Methotrexate                                |
| 196 | 303-34-4   | Lasiocarpine                                |
| 197 | 22571-95-5 | Symphytine                                  |
| 198 | 315-22-0   | Monocrotaline                               |
| 199 | 97-53-0    | Eugenol                                     |
| 200 | 52214-84-3 | Ciprofibrate                                |
| 201 | 77-92-9    | 1,2,3-Propanetricarboxylic acid, 2-hydroxy- |
| 202 | 104-76-7   | 2-Ethylhexanol                              |

| No. | CASRN      | Chemical Name                       |
|-----|------------|-------------------------------------|
| 203 | 25812-30-0 | Gemfibrozil                         |
| 204 | 78-42-2    | Tris(2-ethylhexyl)phosphate         |
| 205 | 75330-75-5 | Lovastatin                          |
| 206 | 131-17-9   | Diallyl phthalate                   |
| 207 | 85-68-7    | Butyl benzyl phthalate              |
| 208 | 87-68-3    | Hexachloro-1,3-butadiene            |
| 209 | 127-18-4   | Tetrachloroethylene                 |
| 210 | 116-14-3   | Tetrafluoroethylene                 |
| 211 | 79-01-6    | Trichloroethylene                   |
| 212 | 1825-21-4  | Pentachloroanisole                  |
| 213 | 476-66-4   | Ellagic acid                        |
| 214 | 90-43-7    | o-Phenylphenol                      |
| 215 | 51481-61-9 | Cimetidine                          |
| 216 | 86315-52-8 | Isomazole                           |
| 217 | 50-44-2    | 6-Mercaptopurine                    |
| 218 | 58-55-9    | Theophylline                        |
| 219 | 148-79-8   | Thiabendazole                       |
| 220 | 73590-58-6 | Omeprazole                          |
| 221 | 58-93-5    | Hydrochlorothiazide                 |
| 222 | 54-31-9    | Furosemide                          |
| 223 | 94-58-6    | Dihydrosafrole                      |
| 224 | 120-62-7   | Piperonyl sulfoxide                 |
| 225 | 533-31-3   | Sesamol                             |
| 226 | 56-23-5    | Carbon tetrachloride                |
| 227 | 67-72-1    | Hexachloroethane                    |
| 228 | 72-43-5    | Methoxychlor                        |
| 229 | 76-03-9    | Trichloroacetic acid                |
| 230 | 51-52-5    | 6-Propyl-2-thiouracil               |
| 231 | 30516-87-1 | 3'-Azido-3'-deoxythymidine (AIDS)   |
| 232 | 141-90-2   | Thiouracil                          |
| 233 | 477-30-5   | Colcemid                            |
| 234 | 123-73-9   | Crotonaldehyde                      |
| 235 | 2475-45-8  | C.I. Disperse blue 1                |
| 236 | 81-49-2    | 1-Amino-2,4-dibromoanthraquinone    |
| 237 | 117-79-3   | 2-Aminoanthraquinone                |
| 238 | 82-28-0    | 1-Amino-2-methylantraquinone        |
| 239 | 79-19-6    | Thiosemicarbazide                   |
| 240 | 142-46-1   | 2,5-Dithiobiurea                    |
| 241 | 13010-08-7 | N-Butyl-N'-nitro-N-nitrosoguanidine |
| 242 | 59-87-0    | Nitrofurazone                       |
| 243 | 2302-84-3  | 1-Formyl-3-thiosemicarbazide        |

| No. | CASRN      | Chemical Name                                            |
|-----|------------|----------------------------------------------------------|
| 244 | 3570-75-0  | Formic acid 2-[4-(5-nitro-2-furyl)-2-thiazolyl]hydrazide |
| 245 | 555-84-0   | 1-[(5-Nitrofurfurylidene)amino]-2-imidazolidinone        |
| 246 | 91-93-0    | 3,3'-Dimethoxybenzidine-4,4'-diisocyanate                |
| 247 | 103-85-5   | 1-Phenyl-2-thiourea                                      |
| 248 | 5522-43-0  | 1-Nitropyrene                                            |
| 249 | 53-95-2    | N-Hydroxy-2-acetylaminofluorene                          |
| 250 | 3096-50-2  | N-(9-Oxo-2-fluorenyl)acetamide                           |
| 251 | 607-57-8   | 2-Nitrofluorene                                          |
| 252 | 363-17-7   | N-(2-Fluorenyl)-2,2,2-trifluoroacetamide                 |
| 253 | 28314-03-6 | 1-Acetylaminofluorene                                    |
| 254 | 53-96-3    | 2-Acetylaminofluorene                                    |
| 255 | 28322-02-3 | 4-Acetylaminofluorene                                    |
| 256 | 67730-10-3 | Glu-P-2                                                  |
| 257 | 76180-96-6 | IQ                                                       |
| 258 | 943-41-9   | N-Nitroso-N-methyl-4-nitroaniline                        |
| 259 | 5461-85-8  | N-Isobutyl-N'-nitro-N-nitrosoguanidine                   |
| 260 | 13010-10-1 | N-Pentyl-N'-nitro-N-nitrosoguanidine                     |
| 261 | 99-80-9    | N-Methyl-N,4-dinitrosoaniline                            |
| 262 | 70-25-7    | 1-Methyl-3-nitro-1-nitroso-guanidine                     |
| 263 | 13010-07-6 | N-Propyl-N'-nitro-N-nitrosoguanidine                     |
| 264 | 34627-78-6 | 1'-Acetoxysafrole                                        |
| 265 | 94-52-0    | 6-Nitrobenzimidazole                                     |
| 266 | 121-88-0   | 2-Amino-5-nitrophenol                                    |
| 267 | 5307-14-2  | 2-Nitro-p-phenylenediamine                               |
| 268 | 2425-85-6  | C.I. Pigment red 3                                       |
| 269 | 712-68-5   | 2-Amino-5-(5-nitro-2-furyl)-1,3,4-thiadiazole            |
| 270 | 99-56-9    | 4-Nitro-o-phenylenediamine                               |
| 271 | 99-55-8    | 5-Nitro-o-toluidine                                      |
| 272 | 99-57-0    | 2-Amino-4-nitrophenol                                    |
| 273 | 119-34-6   | 4-Amino-2-nitrophenol                                    |
| 274 | 1777-84-0  | 3-Nitro-p-acetophenetide                                 |
| 275 | 6471-49-4  | C.I. Pigment red 23                                      |
| 276 | 121-66-4   | 2-Amino-5-nitrothiazole                                  |
| 277 | 446-86-6   | Azathioprine                                             |
| 278 | 1582-09-8  | Trifluralin, technical grade                             |
| 279 | 531-82-8   | N-[4-(5-Nitro-2-furyl)-2-thiazolyl]acetamide             |
| 280 | 619-17-0   | 4-Nitroanthranilic acid                                  |
| 281 | 33229-34-4 | HC blue 2                                                |
| 282 | 15721-02-5 | 2,2',5,5'-Tetrachlorobenzidine                           |
| 283 | 97-56-3    | o-Aminoazotoluene                                        |
| 284 | 58-14-0    | Pyrimethamine                                            |

| No. | CASRN      | Chemical Name                              |
|-----|------------|--------------------------------------------|
| 285 | 80-08-0    | 4,4'-Sulfonyldianiline (Dapsone)           |
| 286 | 95-80-7    | 2,4-Diaminotoluene (2,4-toluene diamine)   |
| 287 | 91-94-1    | 3,3'-Dichlorobenzidine                     |
| 288 | 106-50-3   | 1,4-Benzenediamine                         |
| 289 | 133-90-4   | Chloramben                                 |
| 290 | 101-14-4   | 4,4'-Methylenebis(2-chloroaniline)         |
| 291 | 2243-62-1  | 1,5-Naphthalenediamine                     |
| 292 | 101-80-4   | 4,4'-Oxydianiline                          |
| 293 | 5131-60-2  | 4-Chloro-m-phenylenediamine                |
| 294 | 95-74-9    | 3-Chloro-p-toluidine                       |
| 295 | 95-79-4    | 5-Chloro-o-toluidine                       |
| 296 | 838-88-0   | 4,4'-Methylene-bis(2-methylaniline)        |
| 297 | 92-87-5    | Benzidine                                  |
| 298 | 102-50-1   | m-Cresidine                                |
| 299 | 120-71-8   | p-Cresidine                                |
| 300 | 609-20-1   | 2,6-Dichloro-p-phenylenediamine            |
| 301 | 62-53-3    | Aniline                                    |
| 302 | 101-79-1   | 4-Chloro-4'-aminodiphenylether             |
| 303 | 137-17-7   | 2,4,5-Trimethylaniline                     |
| 304 | 91-59-8    | 2-Naphthylamine                            |
| 305 | 106-47-8   | p-Chloroaniline                            |
| 306 | 1912-24-9  | Atrazine                                   |
| 307 | 60-11-7    | 4-Dimethylaminoazobenzene                  |
| 308 | 55-80-1    | 3'-Methyl-4-dimethylaminoazobenzene        |
| 309 | 101-61-1   | 4,4'-Methylenebis(N,N-dimethyl)benzenamine |
| 310 | 2784-94-3  | HC blue 1                                  |
| 311 | 121-69-7   | N,N-Dimethylaniline                        |
| 312 | 90-94-8    | Michler's ketone                           |
| 313 | 2832-40-8  | C.I. Disperse yellow 3                     |
| 314 | 398-32-3   | N-4-(4'-Fluorobiphenyl)acetamide           |
| 315 | 4463-22-3  | 3-Hydroxy-4-acetylamino-biphenyl           |
| 316 | 62-44-2    | Phenacetin                                 |
| 317 | 6673-35-4  | Practolol                                  |
| 318 | 77-46-3    | 4,4'-Sulfonylbisacetanilide                |
| 319 | 18699-02-0 | 4-Acetylamino-phenylacetic acid            |
| 320 | 103-33-3   | Azobenzene                                 |
| 321 | 842-07-9   | C.I Solvent yellow 14                      |
| 322 | 599-79-1   | Salicylazosulfapyridine                    |
| 323 | 924-42-5   | N-Methylolacrylamide                       |
| 324 | 22131-79-9 | Alclofenac                                 |
| 325 | 101-05-3   | Anilazine                                  |



| No. | CASRN      | Chemical Name                                                        |
|-----|------------|----------------------------------------------------------------------|
| 326 | 37087-94-8 | 2-Chloro-5-(3,5-dimethylpiperidinosulphonyl)benzoic acid             |
| 327 | 2698-41-1  | o-Chlorobenzalmalononitrile (CS)                                     |
| 328 | 108-90-7   | Chlorobenzene                                                        |
| 329 | 94-20-2    | Chlorpropamide                                                       |
| 330 | 106-46-7   | 1,4-Dichlorobenzene (p-dichlorobenzene)                              |
| 331 | 53-86-1    | Indomethacin                                                         |
| 332 | 2227-13-6  | p-Chlorophenyl-2,4,5-trichlorophenyl sulfide                         |
| 333 | 72-55-9    | p,p'-Dichlorodiphenyl dichloroethylene                               |
| 335 | 115-32-2   | Dichlorodiphenyltrichloroethane (DDT)                                |
| 336 | 94-59-7    | Safrole                                                              |
| 337 | 95-06-7    | Sulfallate                                                           |
| 338 | 103-23-1   | Di(2-ethylhexyl)adipate                                              |
| 339 | 133-07-3   | N-(Trichloromethylthio)phthalimide                                   |
| 340 | 23255-69-8 | Fusarenon-X                                                          |
| 341 | 765-34-4   | Glycidaldehyde                                                       |
| 342 | 106-89-8   | Epichlorhydrin                                                       |
| 343 | 76-01-7    | Pentachloroethane                                                    |
| 344 | 56980-93-9 | Celiprolol                                                           |
| 345 | 101-21-3   | Isopropyl-N-(3-chlorophenyl) carbamate                               |
| 346 | 135-88-6   | N-Phenyl-2-naphthylamine                                             |
| 347 | 74-31-7    | N,N'-Diphenyl-p-phenylenediamine                                     |
| 348 | 622-51-5   | p-Tolylurea                                                          |
| 349 | 5979-28-2  | C.I. pigment yellow 16                                               |
| 350 | 968-81-0   | Acetohexamide                                                        |
| 351 | 79-10-7    | Acrylic acid                                                         |
| 352 | 107-18-6   | Allyl alcohol                                                        |
| 353 | 60-32-2    | 6-Aminocaproic acid                                                  |
| 354 | 60142-96-3 | 1-(Aminomethyl)cyclohexaneacetic acid                                |
| 355 | 57-43-2    | Amobarbital                                                          |
| 356 | 50-81-7    | L-Ascorbic acid                                                      |
| 357 | 22839-47-0 | Aspartame                                                            |
| 358 | 51-55-8    | Atropine                                                             |
| 359 | 71-43-2    | Benzene                                                              |
| 360 | 271-89-6   | Benzofuran                                                           |
| 361 | 120-32-1   | o-Benzyl-p-chlorophenol                                              |
| 362 | 110-97-4   | Diisopropanolamine                                                   |
| 363 | 96-48-0    | Gamma-butyrolactone                                                  |
| 364 | 58-08-2    | Caffeine                                                             |
| 365 | 105-60-2   | Caprolactam                                                          |
| 366 | 7235-40-7  | beta-Carotene                                                        |
| 367 | 50892-23-4 | (4-Chloro-6-(2,3-xylidino)-2-pyrimidinylthio) acetic acid (WY-14643) |

| No. | CASRN      | Chemical Name                                             |
|-----|------------|-----------------------------------------------------------|
| 368 | 22494-47-9 | Clobuzarit                                                |
| 369 | 76-57-3    | Codeine                                                   |
| 370 | 31698-14-3 | Cyclocytidine                                             |
| 371 | 1192-28-5  | Cyclopentanone oxime                                      |
| 372 | 53-43-0    | Dehydroepiandrosterone                                    |
| 373 | 333-41-5   | Diazinon                                                  |
| 374 | 1717-00-6  | Ethane, 1,1-dichloro-1-fluoro-                            |
| 375 | 2921-88-2  | Chlorpyrifos (Dursban)                                    |
| 376 | 111-46-6   | Diethylene glycol                                         |
| 377 | 56-53-1    | Diethylstilbestrol                                        |
| 378 | 60-51-5    | Dimethoate                                                |
| 379 | 120-61-6   | Dimethyl terephthalate                                    |
| 380 | 127-19-5   | N,N-Dimethylacetamide                                     |
| 381 | 57-41-0    | 5,5-Diphenylhydantoin (phenytoin)                         |
| 382 | 63-84-3    | dl-Dopa                                                   |
| 383 | 2629-59-6  | S-Ethyl-L-cysteine                                        |
| 384 | 100-41-4   | Ethylbenzene                                              |
| 385 | 41340-25-4 | Etodolac                                                  |
| 386 | 55-38-9    | Fenthion                                                  |
| 387 | 118-74-1   | hexachlorobenzene                                         |
| 388 | 319-84-6   | alpha-1,2,3,4,5,6-Hexachlorocyclohexane                   |
| 389 | 77-47-4    | Hexachlorocyclopentadiene (HCCPD)                         |
| 390 | 70-30-4    | Hexachlorophene                                           |
| 391 | 100-97-0   | Urotropine                                                |
| 392 | 136-77-6   | 4-Hexylresorcinol                                         |
| 393 | 15687-27-1 | Ibuprofen                                                 |
| 394 | 5989-27-5  | D-Limonene                                                |
| 395 | 1634-78-2  | Malaoxon                                                  |
| 396 | 89-78-1    | dl-Menthol                                                |
| 397 | 67-98-1    | MER-25                                                    |
| 398 | 149-30-4   | 2-Mercaptobenzothiazole                                   |
| 399 | 493-78-7   | Methaphenilene                                            |
| 400 | 150-76-5   | Hydroquinone monomethyl ether                             |
| 401 | 1634-04-4  | Methyl-t-butyl ether                                      |
| 402 | 872-50-4   | N-Methyl-2-pyrrolidone                                    |
| 403 | 98-85-1    | alpha-Methylbenzyl alcohol                                |
| 404 | 452-86-8   | p-Methylcatechol                                          |
| 405 | 119-47-1   | Phenol, 2,2'-methylenebis[6-(1,1-dimethylethyl)-4-methyl- |
| 406 | 91-62-3    | 6-Methylquinoline                                         |
| 407 | 54-11-5    | Nicotine                                                  |
| 408 | 139-13-9   | Nitrilotriacetic acid (NTA)                               |

| No. | CASRN      | Chemical Name                                          |
|-----|------------|--------------------------------------------------------|
| 409 | 600-24-8   | 2-Nitrobutane                                          |
| 410 | 75-52-5    | Nitromethane                                           |
| 411 | 64224-21-1 | Oltipraz                                               |
| 412 | 23135-22-0 | Oxamyl                                                 |
| 413 | 149-29-1   | Patulin                                                |
| 414 | 108-95-2   | Phenol                                                 |
| 415 | 77-09-8    | Phenolphthalein                                        |
| 416 | 92-13-7    | Pilocarpine                                            |
| 417 | 110-85-0   | Piperazine                                             |
| 418 | 110-89-4   | Piperidine                                             |
| 419 | 57-66-9    | Probenecid                                             |
| 420 | 121-79-9   | Propyl gallate                                         |
| 421 | 115-07-1   | Propylene                                              |
| 422 | 57-55-6    | 1,2-Propylene glycol                                   |
| 423 | 99-50-3    | Protocatechuic acid                                    |
| 424 | 98-96-4    | Pyrazinamide                                           |
| 425 | 108-46-3   | Resorcinol                                             |
| 426 | 127-47-9   | Retinol acetate                                        |
| 427 | 79-81-2    | All-trans-retinyl palmitate                            |
| 428 | 81-07-2    | Saccharin                                              |
| 429 | 108-30-5   | Succinic anhydride                                     |
| 430 | 107-35-7   | L-Taurine                                              |
| 431 | 732-26-3   | Phenol, 2,4,6-tris(1,1-dimethylethyl)-                 |
| 432 | 2438-88-2  | 2,3,5,6-Tetrachloro-4-nitroanisole                     |
| 433 | 109-99-9   | Ethane, 1,1,1,2-tetrafluoro-                           |
| 434 | 91-79-2    | Thenyldiamine                                          |
| 435 | 96-69-5    | 4,4-Thiobis(6-tert-butyl-m-cresol)                     |
| 436 | 64-77-7    | Tolbutamide                                            |
| 437 | 88-19-7    | o-Toluenesulfonamide                                   |
| 438 | 76-13-1    | 1,1,2-Trichloro-1,2,2-trifluoroethane, technical grade |
| 439 | 71-55-6    | 1,1,1-Trichloroethane, technical grade                 |
| 440 | 75-69-4    | Trichlorofluoromethane                                 |
| 441 | 88-06-2    | 2,4,6-Trichlorophenol                                  |
| 442 | 112-27-6   | Triethylene glycol                                     |
| 443 | 127-48-0   | Trimethadione                                          |
| 444 | 458-37-7   | Turmeric ( 98% curcumin)                               |
| 445 | 57-13-6    | Urea                                                   |
| 446 | 88-12-0    | 2-Pyrrolidinone, 1-ethenyl-                            |
| 447 | 127-06-0   | Acetoxime                                              |
| 448 | 616-91-1   | N-acetylcysteine                                       |
| 449 | 2835-39-4  | Allyl isovalerate                                      |

| No. | CASRN      | Chemical Name                                                       |
|-----|------------|---------------------------------------------------------------------|
| 450 | 2432-99-7  | 11-Aminoundecanoic acid                                             |
| 451 | 4180-23-8  | Benzene, 1-methoxy-4-(1E)-1-propenyl-                               |
| 452 | 65-85-0    | Benzoic acid                                                        |
| 453 | 331-39-5   | 3,4-Dihydroxycinnamic acid                                          |
| 454 | 853-23-6   | Dehydroepiandrosterone acetate                                      |
| 455 | 95-50-1    | 1,2-Dichlorobenzene (o-dichlorobenzene)                             |
| 456 | 94-75-7    | 2,4-Dichlorophenoxyacetic acid                                      |
| 457 | 685-91-6   | Diethylacetamide                                                    |
| 458 | 62488-57-7 | 5,6-Dihydro-5-azacytidine                                           |
| 459 | 13265-60-6 | O,O-Dimethyl S-2(acetylamino)ethyl dithiophosphate, technical grade |
| 460 | 13073-35-3 | Ethionine (DL-ethionine)                                            |
| 461 | 64-17-5    | Ethanol                                                             |
| 462 | 111-68-2   | Heptylamine                                                         |
| 463 | 148-24-3   | 8-Hydroxyquinoline                                                  |
| 464 | 115-11-7   | Isobutene                                                           |
| 465 | 121-75-5   | Malathion                                                           |
| 466 | 531-06-6   | Methafurylene                                                       |
| 467 | 112-63-0   | Methyl linoleate, native                                            |
| 468 | 578-76-7   | 7-Methylguanine                                                     |
| 469 | 95-71-6    | Methylhydroquinone                                                  |
| 470 | 79-24-3    | Nitroethane                                                         |
| 471 | 79-46-9    | 2-Nitropropane                                                      |
| 472 | 50-06-6    | Phenobarbital                                                       |
| 473 | 89-25-8    | 1-Phenyl-3-methyl-5-pyrazolone                                      |
| 474 | 1918-02-1  | Picloram, technical grade                                           |
| 475 | 105-11-3   | p-Benzoquinone dioxime                                              |
| 476 | 23031-25-6 | Terbutaline                                                         |
| 477 | 1972-08-3  | 1-trans-delta-9-Tetrahydrocannabinol                                |
| 478 | 538-23-8   | Tricaprylin                                                         |
| 479 | 95-63-6    | Benzene, 1,2,4-trimethyl-                                           |
| 480 | 75-38-7    | Vinylidene fluoride                                                 |

### S3 Distribution of prediction combinations

**Prediction:** 0  $\Rightarrow$  Non-carcinogen 1  $\Rightarrow$  Carcinogen

Table S3: Prediction combination table with number of chemicals with the prediction combination for Dataset 1. The dataset consists of 332 chemicals with a carcinogen to non-carcinogen ratio of 114:218.

| Combination Number | Toxtree | Lazar | Danish QSAR | OECD Toolbox | Number of chemicals |
|--------------------|---------|-------|-------------|--------------|---------------------|
| $s_1$              | 0       | 0     | 0           | 0            | 110                 |
| $s_2$              | 0       | 0     | 0           | 1            | 0                   |
| $s_3$              | 0       | 0     | 1           | 0            | 27                  |
| $s_4$              | 0       | 0     | 1           | 1            | 0                   |
| $s_5$              | 0       | 1     | 0           | 0            | 30                  |
| $s_6$              | 0       | 1     | 0           | 1            | 1                   |
| $s_7$              | 0       | 1     | 1           | 0            | 29                  |
| $s_8$              | 0       | 1     | 0           | 1            | 1                   |
| $s_9$              | 0       | 1     | 1           | 1            | 2                   |
| $s_{10}$           | 1       | 0     | 0           | 0            | 9                   |
| $s_{11}$           | 1       | 0     | 0           | 1            | 0                   |
| $s_{12}$           | 1       | 0     | 1           | 0            | 35                  |
| $s_{13}$           | 1       | 0     | 1           | 1            | 0                   |
| $s_{14}$           | 1       | 1     | 0           | 0            | 14                  |
| $s_{15}$           | 1       | 1     | 0           | 1            | 0                   |
| $s_{16}$           | 1       | 1     | 1           | 1            | 57                  |

Table S4: Prediction combination table with number of chemicals with the prediction combination for Dataset 2. The dataset consists of 480 chemicals with a carcinogen to non-carcinogen ratio of 258:222.

| Combination Number | Toxtree | Lazar | Danish QSAR | OECD Toolbox | Number of chemicals |
|--------------------|---------|-------|-------------|--------------|---------------------|
| $s_1$              | 0       | 0     | 0           | 0            | 40                  |
| $s_2$              | 0       | 0     | 0           | 1            | 6                   |
| $s_3$              | 0       | 0     | 1           | 0            | 48                  |
| $s_4$              | 0       | 0     | 1           | 1            | 5                   |
| $s_5$              | 0       | 1     | 0           | 0            | 8                   |
| $s_6$              | 0       | 1     | 0           | 1            | 1                   |
| $s_7$              | 0       | 1     | 1           | 0            | 28                  |
| $s_8$              | 0       | 1     | 0           | 1            | 3                   |
| $s_9$              | 0       | 1     | 1           | 1            | 1                   |
| $s_{10}$           | 1       | 0     | 0           | 0            | 29                  |
| $s_{11}$           | 1       | 0     | 0           | 1            | 2                   |
| $s_{12}$           | 1       | 0     | 1           | 0            | 70                  |
| $s_{13}$           | 1       | 0     | 1           | 1            | 1                   |
| $s_{14}$           | 1       | 1     | 0           | 0            | 14                  |
| $s_{15}$           | 1       | 1     | 0           | 1            | 5                   |
| $s_{16}$           | 1       | 1     | 1           | 1            | 219                 |
